# Supplementary material
Source: PubMed Central journal article supplement (PMC6604053)
Supplement: NIHMS1026532-supplement-Supplemental.pdf [file NIHMS1026532-supplement-Supplemental.pdf]

| <b>Supplemental Table S1: Baseline mean group strength comparisons by JSW group.</b> |                                                               |                         |                         |                                      |                                      |                                       |
|--------------------------------------------------------------------------------------|---------------------------------------------------------------|-------------------------|-------------------------|--------------------------------------|--------------------------------------|---------------------------------------|
|                                                                                      | <b>Mean Side-to-Side Percent Values<br/>(% inj vs normal)</b> |                         |                         | <b>Effect Size</b>                   |                                      |                                       |
|                                                                                      | <b>Control</b>                                                | <b>ACLR-<br/>Normal</b> | <b>ACLR-<br/>Narrow</b> | <b>Control vs<br/>ACL<br/>Normal</b> | <b>Control vs<br/>ACL<br/>Narrow</b> | <b>ACL Norm<br/>vs ACL<br/>Narrow</b> |
| <b>Isokinetic Test</b>                                                               |                                                               |                         |                         |                                      |                                      |                                       |
| <b>Extension 60°/sec</b>                                                             | 100                                                           | 67                      | 58                      | 1.489                                | 1.910                                | 0.421                                 |
| (SD)                                                                                 | (10.7)                                                        | (15.9)                  | (13.2)                  |                                      |                                      |                                       |
| <b>Extension 180°/sec</b>                                                            | 101                                                           | 81                      | 74                      | 1.289                                | 1.725                                | 0.436                                 |
| (SD)                                                                                 | (10.0)                                                        | (11.2)                  | (15.9)                  |                                      |                                      |                                       |
| <b>Extension 300°/sec</b>                                                            | 99                                                            | 83                      | 80                      | 1.131                                | 1.352                                | 0.221                                 |
| (SD)                                                                                 | (9.0)                                                         | (12.1)                  | (19.5)                  |                                      |                                      |                                       |
| <b>Flexion 60°/sec</b>                                                               | 102                                                           | 77                      | 76                      | 1.281                                | 1.341                                | 0.059                                 |
| (SD)                                                                                 | (14.0)                                                        | (15.5)                  | (12.0)                  |                                      |                                      |                                       |
| <b>Flexion 180°/sec</b>                                                              | 101                                                           | 87                      | 80                      | 1.107                                | 1.602                                | 0.495                                 |
| (SD)                                                                                 | (8.8)                                                         | (11.8)                  | (9.8)                   |                                      |                                      |                                       |
| <b>Flexion 300°/sec</b>                                                              | 98                                                            | 88                      | 84                      | 0.878                                | 1.194                                | 0.316                                 |
| (SD)                                                                                 | (9.9)                                                         | (10.2)                  | (9.4)                   |                                      |                                      |                                       |
| <b>Extension to Flexion<br/>Ratio</b>                                                | <b>Injured Knee Ext:Flexion Ratio</b>                         |                         |                         |                                      |                                      |                                       |
| <b>Ext:Flex 60°/sec</b>                                                              | 1.6                                                           | 1.5                     | 1.3                     | 0.590                                | 1.010                                | 0.420                                 |
| (SD)                                                                                 | (0.3)                                                         | (0.3)                   | (0.2)                   |                                      |                                      |                                       |
| <b>Ext:Flex 180°/sec</b>                                                             | 1.4                                                           | 1.3                     | 1.3                     | 0.490                                | 0.513                                | 0.023                                 |
| (SD)                                                                                 | (0.2)                                                         | (0.2)                   | (0.2)                   |                                      |                                      |                                       |
| <b>Ext:Flex 300°/sec</b>                                                             | 1.3                                                           | 1.1                     | 1.2                     | 0.637                                | 0.438                                | 0.199                                 |
| (SD)                                                                                 | (0.2)                                                         | (0.2)                   | (0.2)                   |                                      |                                      |                                       |

| <b>Supplemental Table A2: Between group effect sizes for additional outcomes at baseline and final follow-up evaluation.</b> |                            |                              |                               |                            |                              |                               |
|------------------------------------------------------------------------------------------------------------------------------|----------------------------|------------------------------|-------------------------------|----------------------------|------------------------------|-------------------------------|
|                                                                                                                              | <b>Baseline</b>            |                              |                               | <b>Final Follow-up</b>     |                              |                               |
|                                                                                                                              | <b>Control vs ACL Norm</b> | <b>Control vs ACL Narrow</b> | <b>ACL Norm vs ACL Narrow</b> | <b>Control vs ACL Norm</b> | <b>Control vs ACL Narrow</b> | <b>ACL Norm vs ACL Narrow</b> |
| <b>IKDC Objective</b>                                                                                                        | 1.680                      | 1.735                        | 0.055                         | 1.295                      | 1.488                        | 0.193                         |
| <b>IKDC Subjective</b>                                                                                                       | 1.815                      | 2.059                        | 0.244                         | 1.003                      | 1.852                        | 0.849                         |
| <b>KT1000 (Norm - Inj)</b>                                                                                                   | 1.042                      | 1.878                        | 0.836                         | 1.004                      | 1.486                        | 0.481                         |
| <b>MARX</b>                                                                                                                  | 1.530                      | 1.493                        | 0.036                         | 0.342                      | 0.808                        | 1.150                         |
| <b>Tegner</b>                                                                                                                | 1.426                      | 1.709                        | 0.283                         | 0.606                      | 0.551                        | 1.157                         |
| <b>KOOS: Pain</b>                                                                                                            | 1.583                      | 1.956                        | 0.373                         | 0.808                      | 1.115                        | 0.307                         |
| <b>KOOS: Quality of Life</b>                                                                                                 | 1.739                      | 2.130                        | 0.391                         | 0.870                      | 1.936                        | 1.066                         |
| <b>KOOS: Activities of Daily Living</b>                                                                                      | 1.264                      | 1.222                        | 0.043                         | 0.704                      | 0.460                        | 0.244                         |
| <b>KOOS: Symptoms</b>                                                                                                        | 1.652                      | 1.750                        | 0.098                         | 0.985                      | 1.111                        | 0.126                         |
| <b>KOOS: Sports</b>                                                                                                          | 1.582                      | 1.836                        | 0.254                         | 0.789                      | 1.586                        | 0.797                         |
